# Supplementary material
Source: PubMed Central journal article supplement (PMC2743200)

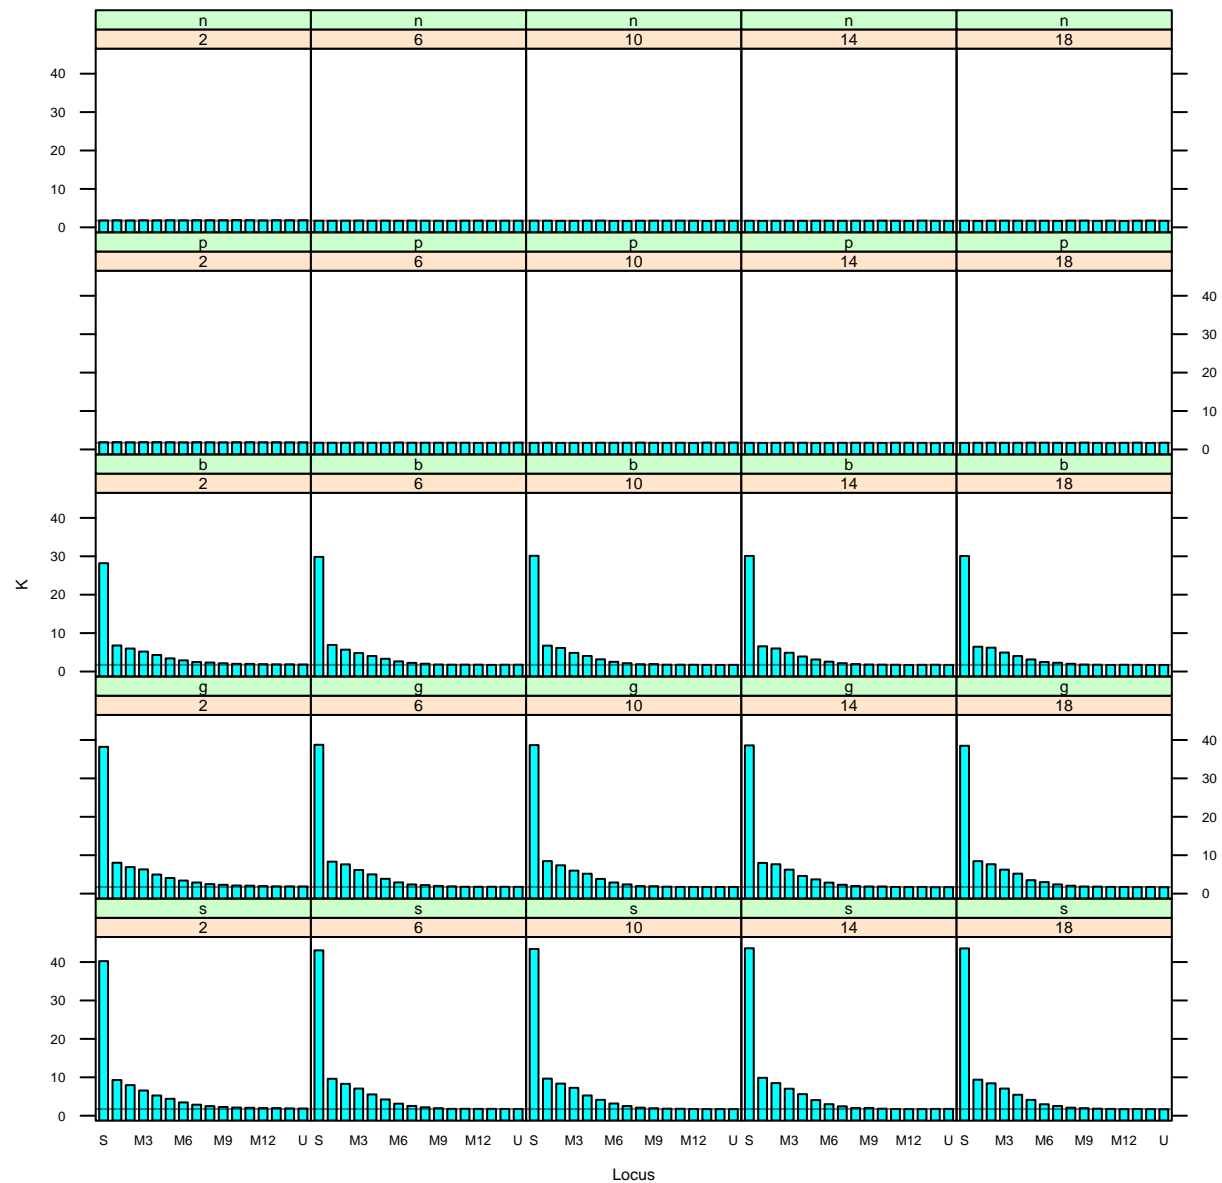

Supplement: NIHMS116784-supplement-Supp_Figs.pdf [file NIHMS116784-supplement-Supp_Figs.pdf]
